# Supplementary material for: Phosphorylation of AHR by PLK1 promotes metastasis of LUAD via DIO2-TH signaling
Source: PLoS Genet. 2023 Nov 21;19(11):e1011017. doi: 10.1371/journal.pgen.1011017 (PMC10662729; doi:10.1371/journal.pgen.1011017)
Supplement: S6 Table — (XLSX) [file pgen.1011017.s015.xlsx]

## Sheet: Metastasis
DI #	Expression score	Histology	Differentiation	T	N	Stage	Recurrence Status
BH-500	0	Adenocarcinoma	Moderate	T2	N2	IIIA	Never disease-free
BH-316	0	Adenocarcinoma	Poor	T2	N2	IIIA	None, disease-free
BH-575	0	Adenocarcinoma	Well	T1	N0	IA	None, disease-free
BH-322	0	Adenocarcinoma	Moderate	T2	N1	IIB	Distant recurrence of an invasive tumor in the CNS only
BH-333	1	Adenosquamous	Moderate	T2	N0	IB	None, disease-free
BH-506	1	Adenocarcinoma	Moderate	T2a	N0	IB	None, disease-free
BH-605	1	Adenosquamous	Poor	T3	N2	IIIA	None, disease-free
BH-511	1	Adenocarcinoma	Moderate	T2a	N0	IB	None, disease-free
BH-437	1	Adenocarcinoma	Moderate	T2	N2	IIIA	None, disease-free
BH-433	1	Adenocarcinoma	Moderate	T1	N1	IIA	Never disease-free
BH-422	1	Adenocarcinoma	Moderate	T1	N0	IA	None, disease-free
BH-475	1	Adenocarcinoma	Poor	T1	N1	IIA	None, disease-free
BH-423	1	Adenocarcinoma	Poor	T2	N0	IB	None, disease-free
BH-491	1	Adenocarcinoma	Moderate	T2	NX	NA	Never disease-free
BH-484	1	Adenocarcinoma	Poor	T1	N0	IA	None, disease-free
BH-496	1	Adenocarcinoma	Moderate	T2	N1	IIB	None, disease-free
BH-536	1	Adenocarcinoma	Well	T2	N0	IB	Never disease-free
BH-315	1	Adenocarcinoma	Moderate	T1	N0	IA	Local recurrence of an invasive tumor
BH-439	1	Adenocarcinoma	Moderate	T2	N0	IB	Distant recurrence of an invasive tumor in the CNS only
bh-569	1	Adenocarcinoma	Moderate	T2	N0	IB	Local recurrence of an invasive tumor
BH-489	1	Adenocarcinoma	Poor	T2	N0	IB	Distant recurrence of an invasive tumor in the CNS only
BH-598	2	Adenosquamous	Poor	T2	N0	IB	None, disease-free
BH-495	2	Adenocarcinoma	Poor	T2	NX	NA	Never disease-free
BH-342	2	Adenosquamous	Poor	T1	N0	IA	None, disease-free
BH-552	2	Adenocarcinoma	Moderate	T2	N1	IIB	Never disease-free
BH-576	2	Adenocarcinoma	Moderate	T1	N2	IIIA	None, disease-free
BH-542	2	Adenocarcinoma	Poor	T4	N1	IV	Never disease-free
BH-319	2	Adenocarcinoma	Moderate	T1	N0	IA	None, disease-free
BH-477	2	Adenocarcinoma	Poor	T1	N1	IIA	Never disease-free
BH-537	2	Adenocarcinoma	Moderate	T3	N0	IIB	Never disease-free
BH-492	2	Adenocarcinoma	Poor	T2	N2	IIIA	Never disease-free
BH-464	2	Adenocarcinoma	Moderate	T1	N0	IA	None, disease-free
BH-483	2	Adenocarcinoma	Moderate	T2	N0	IB	None, disease-free
BH-547	2	Adenocarcinoma	Moderate	T1	N0	IA	None, disease-free
BH-466	2	Adenocarcinoma	Poor	T1	N0	IA	None, disease-free
BH-573	2	Adenocarcinoma	Well	T1	N0	IA	None, disease-free
BH-501	2	Adenocarcinoma	Poor	T3	N2	IIIA	Never disease-free
BH-479	2	Adenocarcinoma	Poor	T2	N0	IB	Never disease-free
BH-412	2	Adenocarcinoma	Poor	T1	N2	IIIA	Recurred, site unknown
BH-453	2	Adenocarcinoma	Moderate	T2	N0	IB	Recurred, site unknown
BH-494	3	Adenocarcinoma	Moderate	T3	N2	IIIA	None, disease-free
BH-577	3	Adenosquamous	Moderate	T2	N0	IB	Never disease-free
BH-340	3	Adenocarcinoma	Moderate	T1	NX	NA	None, disease-free
BH-507	3	Adenocarcinoma	Poor	T1b	N0	IA	None, disease-free
BH-441	3	Adenocarcinoma	Poor	T2	N0	IB	None, disease-free
BH-582	3	Poorly differentiated adenocarcinoma	Poor	T2	N1	IIB	None, disease-free
BH-410	3	Adenocarcinoma	Moderate	T1	N0	IA	None, disease-free
BH-510	3	Adenosquamous	Poor	T1a	N0	IA	None, disease-free
BH-473	3	Adenocarcinoma	Poor	T2	N1	IIB	Regional tissue
BH-452	4	Adenocarcinoma	Moderate	T1	NX	NA	Never disease-free
BH-416	4	Adenocarcinoma	Poor	T1	N2	IIIA	None, disease-free
BH-460	4	Adenocarcinoma	Moderate	T1	N0	IA	None, disease-free
BH-469	4	Poorly differentiated adenocarcinoma	Poor	T2	N0	IB	None, disease-free
BH-518	6	Adenocarcinoma	Poor	T2	N0	IB	None, disease-free
BH-486	6	Adenocarcinoma	Poor	T2	N0	IB	Regional lymph nodes
BH-440	6	Adenocarcinoma	Poor	T2	N0	IB	Local recurrence of an invasive tumor
BH-556	6	Adenocarcinoma	Well	T2	N0	IB	Distant recurrence of an invasive tumor in multiple sites
BH-497	6	Adenocarcinoma	Well	T2	N1	IIB	Never disease-free
BH-503	6	Adenocarcinoma	Moderate	T4	N0	IIIB	None, disease-free
BH-498	8	Adenocarcinoma	Well	T1	N0	IA	Distant recurrence of an invasive tumor in the lung only
BH-548	8	Adenocarcinoma	Moderate	T2	N1	IIB	Distant recurrence of an invasive tumor in bone only
BH-516	8	Poorly differentiated adenocarcinoa	Poor	T2	N1	IIB	Distant recurrence of an invasive tumor in the CNS only
BH-580	8	Adenocarcinoma	Well	T1	N0	IA	None, disease-free
BH-335	8	Adenocarcinoma	Poor	T2	N0	IB	None, disease-free
BH-435	8	Adenocarcinoma	Moderate	T2	N0	IB	None, disease-free
BH-550	8	Adenocarcinoma	Poor	T2	N0	IB	None, disease-free
BH-504	8	Adenocarcinoma	Moderate	T1a	N0	IA	None, disease-free
BH-436	8	Adenocarcinoma	Moderate	T1	N0	IA	None, disease-free
BH-549	8	Adenocarcinoma	Poor	T1	N0	IA	None, disease-free
BH-442	8	Adenosquamous	Moderate	T2	N1	IIB	None, disease-free
BH-468	8	Adenocarcinoma	Poor	T3	NX	NA	Never disease-free

## Sheet: Survival
DI #	Histology	Differentiation	T	N	Stage	Sex	Thyroid Status	Vital Status	Survival Interval (Months)
BH-579	Poorly differentiated	Poor	T2	N0	IB	M	Euthyroidism	Dead	9.2
BH-498	Adenocarcinoma	Well	T1	N0	IA	F	Euthyroidism	Dead	22
BH-500	Adenocarcinoma	Moderate	T2	N2	IIIA	F	Euthyroidism	Dead	16.2
BH-333	Adenosquamous	Moderate	T2	N0	IB	M	Euthyroidism	Alive	143.233
BH-341	Adenocarcinoma	Poor	T2	N0	IB	F	Euthyroidism	Alive	151.933
BH-598	Adenosquamous	Poor	T2	N0	IB	M	Euthyroidism	Alive	115.533
BH-506	Adenocarcinoma	Moderate	T2a	N0	IB	F	Euthyroidism	Dead	27.6
BH-467	Adenocarcinoma	Poor	T2	N1	IIB	M	Euthyroidism	Alive	150.8
BH-494	Adenocarcinoma	Moderate	T3	N2	IIIA	M	Euthyroidism	Dead	7.1
BH-574	Poorly differentiated	Poor	T2	N0	IB	M	Euthyroidism	Dead	40.7667
BH-577	Adenosquamous	Moderate	T2	N0	IB	M	Euthyroidism	Dead	24.5333
BH-495	Adenocarcinoma	Poor	T2	NX	NA	M	Euthyroidism	Dead	89
BH-340	Adenocarcinoma	Moderate	T1	NX	NA	M	Euthyroidism	Alive	148.033
BH-548	Adenocarcinoma	Moderate	T2	N1	IIB	M	Euthyroidism	Dead	52.0333
BH-508	Adenocarcinoma	Poor	T1b	N0	IA	F	Euthyroidism	Alive	49.6333
BH-342	Adenosquamous	Poor	T1	N0	IA	M	Euthyroidism	Dead	18.9333
BH-516	Poorly differentiated adenocarcinoma	Poor	T2	N1	IIB	M	Euthyroidism	Dead	21.5667
BH-552	Adenocarcinoma	Moderate	T2	N1	IIB	M	Euthyroidism	Dead	27.9
BH-605	Adenosquamous	Poor	T3	N2	IIIA	M	Euthyroidism	Dead	13.1333
BH-518	Adenocarcinoma	Poor	T2	N0	IB	F	Euthyroidism	Alive	157.933
BH-507	Adenocarcinoma	Poor	T1b	N0	IA	M	Euthyroidism	Dead	88.2667
BH-576	Adenocarcinoma	Moderate	T1	N2	IIIA	F	Euthyroidism	Dead	125.133
BH-542	Adenocarcinoma	Poor	T4	N1	IV	F	Euthyroidism	Dead	15.4333
BH-447	Adenocarcinoma	Moderate	T1	N0	IA	F	Euthyroidism	Dead	27.9
BH-427	Adenocarcinoma	Well	T1	N0	IA	M	Euthyroidism	Dead	97.9333
BH-441	Adenocarcinoma	Poor	T2	N0	IB	M	Euthyroidism	Alive	135.867
BH-473	Adenocarcinoma	Poor	T2	N1	IIB	F	Euthyroidism	Dead	50.6
BH-316	Adenocarcinoma	Poor	T2	N2	IIIA	M	Euthyroidism	Dead	88.7667
BH-575	Adenocarcinoma	Well	T1	N0	IA	F	Euthyroidism	Alive	128.133
BH-511	Adenocarcinoma	Moderate	T2a	N0	IB	F	Euthyroidism	Alive	125.033
BH-412	Adenocarcinoma	Poor	T1	N2	IIIA	M	Euthyroidism	Dead	8.6
BH-477	Adenocarcinoma	Poor	T1	N1	IIA	M	Euthyroidism	Dead	17.7667
BH-322	Adenocarcinoma	Moderate	T2	N1	IIB	F	Euthyroidism	Dead	29.7
BH-437	Adenocarcinoma	Moderate	T2	N2	IIIA	F	Euthyroidism	Dead	69.6667
BH-433	Adenocarcinoma	Moderate	T1	N1	IIA	M	Euthyroidism	Dead	34.7
BH-409	Adenocarcinoma	Moderate	T1	N0	IA	M	Euthyroidism	Dead	40.8
BH-315	Adenocarcinoma	Moderate	T1	N0	IA	F	Euthyroidism	Dead	17.6
BH-422	Adenocarcinoma	Moderate	T1	N0	IA	F	Euthyroidism	Alive	137.7
BH-517	Adenocarcinoma	Poor	T2	N1	IIB	F	Euthyroidism	Dead	130.833
BH-475	Adenocarcinoma	Poor	T1	N1	IIA	M	Euthyroidism	Dead	75.5333
BH-537	Adenocarcinoma	Moderate	T3	N0	IIB	F	Euthyroidism	Dead	5.9
BH-492	Adenocarcinoma	Poor	T2	N2	IIIA	F	Euthyroidism	Dead	3.86667
BH-439	Adenocarcinoma	Moderate	T2	N0	IB	M	Euthyroidism	Dead	110
BH-539	Adenocarcinoma	Moderate	T1	N0	IA	F	Euthyroidism	Dead	82.6
BH-327	Adenocarcinoma	Well	T1	N0	IA	F	Euthyroidism	Alive	147.433
bh-569	Adenocarcinoma	Moderate	T2	N0	IB	F	Euthyroidism	Dead	16.2667
BH-464	Adenocarcinoma	Moderate	T1	N0	IA	F	Euthyroidism	Alive	160.2
BH-423	Adenocarcinoma	Poor	T2	N0	IB	F	Euthyroidism	Alive	139.367
BH-491	Adenocarcinoma	Moderate	T2	NX	NA	M	Euthyroidism	Dead	37.7667
BH-483	Adenocarcinoma	Moderate	T2	N0	IB	M	Euthyroidism	Alive	130.367
BH-547	Adenocarcinoma	Moderate	T1	N0	IA	F	Euthyroidism	Dead	70.2667
BH-453	Adenocarcinoma	Moderate	T2	N0	IB	M	Euthyroidism	Dead	31.4333
BH-609	Adenocarcinoma	Moderate	T2a	N0	IB	M	Euthyroidism	Dead	60
BH-320	Adenosquamous	Poor	T2	N1	IIB	M	Euthyroidism	Dead	49.9
BH-580	Adenocarcinoma	Well	T1	N0	IA	F	Euthyroidism	Dead	62.6333
BH-452	Adenocarcinoma	Moderate	T1	NX	NA	M	Euthyroidism	Dead	44.4333
BH-335	Adenocarcinoma	Poor	T2	N0	IB	M	Euthyroidism	Alive	142.633
BH-582	Poorly differentiated adenocarcinoma	Poor	T2	N1	IIB	M	Euthyroidism	Dead	41.7667
BH-435	Adenocarcinoma	Moderate	T2	N0	IB	F	Euthyroidism	Alive	88.7333
BH-515	Adenocarcinoma	Moderate	T2	N1	IIB	F	Euthyroidism	Alive	159.3
BH-486	Adenocarcinoma	Poor	T2	N0	IB	M	Euthyroidism	Dead	66.3667
BH-440	Adenocarcinoma	Poor	T2	N0	IB	F	Euthyroidism	Dead	9.96667
BH-550	Adenocarcinoma	Poor	T2	N0	IB	M	Euthyroidism	Dead	11.7333
BH-466	Adenocarcinoma	Poor	T1	N0	IA	M	Euthyroidism	Dead	116.533
BH-484	Adenocarcinoma	Poor	T1	N0	IA	M	Euthyroidism	Dead	103.033
BH-416	Adenocarcinoma	Poor	T1	N2	IIIA	F	Euthyroidism	Alive	147.367
BH-556	Adenocarcinoma	Well	T2	N0	IB	F	Euthyroidism	Dead	110.433
BH-541	Adenocarcinoma	Poor	T4	N0	IIIB	M	Euthyroidism	Dead	25.4333
BH-328	Adenocarcinoma	Moderate	T2	N1	IIB	M	Euthyroidism	Dead	33.3667
BH-436	Adenocarcinoma	Moderate	T1	N0	IA	F	Euthyroidism	Alive	135.267
BH-496	Adenocarcinoma	Moderate	T2	N1	IIB	F	Euthyroidism	Alive	106.2
BH-497	Adenocarcinoma	Well	T2	N1	IIB	M	Euthyroidism	Dead	22.8
BH-489	Adenocarcinoma	Poor	T2	N0	IB	F	Euthyroidism	Dead	105.067
BH-549	Adenocarcinoma	Poor	T1	N0	IA	M	Euthyroidism	Dead	11.8667
BH-476	Adenocarcinoma	Poor	T2	N1	IIB	F	Euthyroidism	Dead	82.1667
BH-561	Adenocarcinoma	Moderate	T1	N0	IA	F	Euthyroidism	Dead	25.5
BH-510	Adenosquamous	Poor	T1a	N0	IA	M	Euthyroidism	Dead	18.9333
BH-442	Adenosquamous	Moderate	T2	N1	IIB	M	Euthyroidism	Dead	35.1
BH-448	Adenocarcinoma	Moderate	T2	N1	IIB	F	Euthyroidism	Dead	22.8667
BH-589	Adenocarcinoma	Moderate	T2a	N2	IIIA	M	Euthyroidism	Dead	14.3333
BH-536	Adenocarcinoma	Well	T2	N0	IB	M	Euthyroidism	Dead	18.0333
BH-460	Adenocarcinoma	Moderate	T1	N0	IA	M	Euthyroidism	Dead	56.0667
BH-329	Poorly differentiated	Poor	T2	N0	IB	F	Euthyroidism	Dead	114.933
BH-463	Adenocarcinoma	Well	T2	N0	IB	F	Euthyroidism	Dead	33.4667
BH-469	Poorly differentiated adenocarcinoma	Poor	T2	N0	IB	M	Euthyroidism	Dead	78
BH-509	Adenocarcinoma with Mixed histology	Poor	T2b	N1	IIB	M	Euthyroidism	Dead	8.26667
BH-501	Adenocarcinoma	Poor	T3	N2	IIIA	F	Euthyroidism	Dead	4.8
BH-479	Adenocarcinoma	Poor	T2	N0	IB	F	Euthyroidism	Dead	13.6667
BH-503	Adenocarcinoma	Moderate	T4	N0	IIIB	M	Euthyroidism	Alive	12.8667
BH-454	Adenocarcinoma	Well	T1	N0	IA	F	Euthyroidism	Dead	14.4667
BH-319	Adenocarcinoma	Moderate	T1	N0	IA	F	Hypothyroidism	Dead	126.933
BH-504	Adenocarcinoma	Moderate	T1a	N0	IA	F	Hypothyroidism	Alive	134.133
BH-410	Adenocarcinoma	Moderate	T1	N0	IA	F	Hypothyroidism	Dead	40.1667
BH-573	Adenocarcinoma	Well	T1	N0	IA	F	Hypothyroidism	Dead	130.433
BH-443	Adenocarcinoma	Moderate	T2	N0	IB	F	Hypothyroidism	Alive	140.2
BH-468	Adenocarcinoma	Poor	T3	NX	NA	M	Hyperthyroidism	Dead	2.43333
